# Supplementary material for: Multimodal machine learning enables AI chatbot to diagnose ophthalmic diseases and provide high-quality medical responses
Source: Springer Nature journal article supplement (doi:10.1038/s41746-025-01461-0), 2025-01-27
Supplement: 41746_2025_1461_MOESM2_ESM.pdf [file 41746_2025_1461_MOESM2_ESM.pdf]

## **Supplementary Data 1 Ninety dialogues used as prompts across nine key themes**

### **Dry eye (11)**

Dialogue 1:

1: My eyes sometimes feel particularly painful and unbearably itchy, especially at night.

2: 1. Are they still itchy right now?

3: 1. No, not right now.

4: Based on the information you've provided, your diagnosis might be dry eye syndrome. I recommend seeing a cornea specialist. It could be related to the medication itself, although it no longer contains preservatives. Overuse of the eyes and dryness may also be contributing factors. If the itching persists, you can try using artificial tears to see if it helps.

Dialogue 2:

1: My eyes have been uncomfortable ever since I had facial paralysis.

2: 1. Which eye feels uncomfortable, and when did you have the facial paralysis? 2. Can you close your eyes completely? 3. Can you close them tightly when you sleep? Have your family members noticed if you can close them fully?

3: 1. My right eye, and it's been more than a year since the facial paralysis. 2. I can close my eyes completely. 3. I can close them tightly, but my eyes just won't open.

4: Based on the information you've provided, your diagnosis might be dry eye syndrome. I recommend seeing a cornea specialist. Your eyes are quite dry right now, so try to reduce the use of your phone and TV.

Dialogue 3:

1: My eyes are extremely dry, By the afternoon and evening, I can hardly keep them open and need to blink constantly. I often wear contact lenses.

2: 1. Do your eyes itch? 2. Do you often sneeze?

3: 1. Yes, they do. 2. I do sneeze somewhat easily.

4: Based on the information you've provided, your diagnosis may be dry eye syndrome and allergic conjunctivitis. I recommend seeing a cornea specialist. I suggest using anti-

inflammatory and dry eye eye drops, but avoid using steroid eye drops for more than two weeks. Try to wear contact lenses less frequently. Reduce eye strain. Get enough rest. And avoid staying up late.

Dialogue 4:

1: My eyes are extremely dry. By the afternoon and evening, I can barely keep them open and have to blink constantly. I often wear contact lenses.

2: 1. Do your eyes itch? 2. Do you often sneeze?

3: 1. Yes, they itch. 2. I do sneeze somewhat easily.

4: Based on the information you've provided, your diagnosis may be dry eye syndrome and allergic conjunctivitis. I recommend seeing a cornea specialist. Start by using anti-inflammatory and dry eye eye drops, but avoid using steroid drops for more than two weeks. Try to wear contact lenses less frequently, reduce eye strain, get plenty of rest, and avoid staying up late.

Dialogue 5:

1: I feel eye fatigue and my vision is blurry.

2: 1. Can you see far away clearly? How about close up? Where exactly is it blurry? 2. Can you usually see things clearly? 3. Do your eyes itch? Do you keep pets at home? 4. Do you have rhinitis? Does the base of your nose feel itchy in the morning?

3: 1. Both my distance vision and close-up vision are fine. But recently, the area around my brow bone feels a bit blurry, like when I've been driving for a long time. It feels like I can't keep my eyes open. 2. I think I can usually see clearly. 3. My eyes were itchy before but not now, and we don't keep pets at home. 4. I probably don't have rhinitis. The symptoms are more noticeable in the morning.

4: Based on the information you've provided, your diagnosis may be dry eye syndrome and conjunctivitis. I recommend seeing a cornea specialist. Try to reduce eye strain, limit screen time, and avoid smoking. I will prescribe sodium hyaluronate for you—use it before driving to stabilize your tear film. Not blinking enough can also cause this problem. If the base of your nose itches again, you should visit an ENT specialist to

check for any sinus inflammation.

Dialogue 6:

1: I used to have conjunctivitis. After COVID infection, the symptoms of conjunctivitis seem to have worsened. Recently I've been experiencing dryness in the mornings and evenings.

2: 1. Do you have any other systemic issues? 2. Do you wear contact lenses?

3: 1. No. 2. I don't wear them.

4: Based on the information you provided, your diagnosis might be dry eye syndrome. I recommend visiting a cornea specialist. It's advised to reduce the use of electronic devices, take care of your eyes, and avoid staying up late. You can use sodium hyaluronate eye drops to alleviate the symptoms.

Dialogue 7:

1: This afternoon, I started feeling constant dryness in my eyes.

2: 1. Did anything come into contact with your eyes? 2. Do you have any other eye conditions?

3: 1. No, everything was fine in the morning. 2. I've had trichiasis since childhood, but it has never caused irritation.

4: Based on the information you provided, your diagnosis might be trichiasis. I recommend visiting a specialist in orbital and ocular tumor diseases. It's suggested to use soothing eye drops for relief and treat the entropion. Avoid rubbing your eyes.

Dialogue 8:

1: After getting eyelash extensions, my eyes kept tearing up, my left eye couldn't open, and I had a persistent foreign body sensation. It got better after removing them, but my eyes are still very dry.

2: 1. How long has it been?

3: 1. Two hours.

4: Based on the information you provided, your diagnosis might be a corneal epithelial

injury. I recommend visiting a corneal specialist for treatment. You can use eye drops for relief.

Dialogue 9:

1: I wore cosmetic contact lenses all day yesterday, and my eyes felt very dry. Even after resting overnight, my eyes still feel dry and a bit painful.

2: 1. Is your vision blurry? 2. Is there any improvement compared to yesterday?

3: 1. No. 2. No difference.

4: Based on the information you provided, the diagnosis might be dry eye syndrome. I recommend visiting a corneal specialist. Eye drops are needed for treatment, and maintaining eye hygiene is important. Avoid wearing cosmetic or contact lenses for now. If there's no improvement within a week, a follow-up visit to the eye clinic is advised.

Dialogue 10:

1: I usually feel my eyes are dry. In the past two days, I've been tearing up a lot.

2: 1. Have you been using your eyes a lot recently? 2. Has your vision deteriorated? 3. Have you used any eye drops?

3: 1. Quite a lot, I've been staring at screens. 2. No. 3. I used hyaluronic acid eye drops; it feels better after using them, but they still get dry afterward.

4: Based on the information you provided, the diagnosis might be dry eye syndrome. I recommend visiting a corneal specialist. Try to reduce screen time, use warm compresses, or consider comprehensive dry eye treatment.

Dialogue 11:

1: I've been using the computer too much lately, and I feel like I can't keep my eyes open.

2: 1. Has your vision decreased? 2. Have you tried using eye drops?

3: 1. My vision hasn't decreased. 2. I haven't used any eye drops.

4: Based on the information you provided, the diagnosis might be dry eye syndrome. I recommend visiting a corneal specialist. You should use eye drops, reduce screen time,

take more breaks, and try warm compresses.

### **Ithy eye (10)**

Dialogue 1:

1: I have angle-closure glaucoma, and my eyes are a bit itchy. They've been itchy for many years. I came in a few days ago and was prescribed an eye ointment. It's much better now, but still itchy.

2: 1. Did you have laser treatment for your glaucoma? Are you currently using medication? 2. When do your eyes itch? 3. Do you feel a foreign body sensation, like there's something in your eye?

3: 1. Yes, I had laser treatment. I'm using medication now. 2. I often get allergic reactions, and then my eyes start to itch. 3. Sometimes, I do feel it.

4: Based on the information you've provided, your diagnosis may be allergic conjunctivitis and glaucoma. I recommend visiting a cornea and glaucoma specialist. Continue using the eye ointment for another three to five days, but use steroid medications sparingly. You should also check your eye pressure as long as it's below 21. The depth of your anterior chamber is good, and your C/D ratio is fine too.

Dialogue 2:

1: I've had rhinitis for a long time. Whenever it gets worse, I develop conjunctivitis. I came in March and was prescribed cyclosporine.

2: 1. Are your eyes itchy? Is there a lot of discharge?

3: 1. My eyes are not as itchy as before. Every morning my eyes feel very dry. The discharge is okay, mostly dry discharge. The stringy discharge I used to have is gone.

4: Based on the information you've provided, your diagnosis may be allergic conjunctivitis. I recommend seeing a cornea specialist. Continue using the eye drops.

Dialogue 3:

1: My child's eyes are itchy.

2: 1. Is there a lot of eye discharge? 2. Do you have any pets at home? 3. Is the itching

severe?

3: 1. The discharge is not too much. 2. No, we don't have pets. 3. The itching is worse before bedtime.

4: Based on the information you've provided, your diagnosis may be allergic conjunctivitis. I recommend visiting a cornea specialist. Allergy testing is needed, as the allergen could be dust mites. Make sure to clean bedding and towels thoroughly to remove mites. Eye drops are necessary, and it's important to avoid allergens. If the symptoms don't improve, come back for a follow-up in two weeks.

Dialogue 4:

1: My eyes feel constantly itchy. And they keep tearing up.

2: 1. How long has this been going on? 2. Are your eyes red? 3. Do you have a lot of eye discharge?

3: 1. About a week. 2. The corners of my eyes are a bit red. 3. It's not too bad.

4: Based on the information you provided, the diagnosis might be allergic conjunctivitis. I suggest visiting a cornea specialist. It's recommended to use eye drops to treat the allergic conjunctivitis, wash your hands frequently, and reduce eye strain in daily life.

Dialogue 5:

1: My eyes have been itching for years and they hurt after itching. The general clinic prescribed Tobrex, but it doesn't seem to help. Now, my eyes are a bit red.

2: 1. How many days have they been red and swollen?

3: 1. It's been a week.

4: Based on the information you provided, your diagnosis might be conjunctivitis. I recommend visiting a cornea specialist. You should continue using antibiotics, and you may also consider using a small amount of steroids for anti-inflammatory treatment.

Dialogue 6:

1: My eyes have been very itchy for the past half month. I used eye drops, but they are still itchy.

2: 1. What eye drops did you use? 2. Have you been in contact with any animals or plants recently? 3. Do you have allergic rhinitis?

3: 1. I got some anti-allergy eye drops from the hospital. 2. I started raising a cat half a month ago, and then my eyes became itchy. 3. No.

4: Based on the information you provided, the diagnosis might be allergic conjunctivitis. I recommend visiting a corneal specialist. You should continue using the eye drops and pay attention to eye hygiene. If symptoms do not improve within a week, please visit an eye clinic for a follow-up. It is also advisable to visit a dermatologist to test for allergens to determine if the issue is related to the cat.

Dialogue 7:

1: My eyes have been itchy for several days, and they are a bit red.

2: 1. Have you come into contact with anything recently? 2. Have you used any eye drops? 3. Do you rub your eyes a lot?

3: 1. No. 2. I haven't used any. 3. I keep rubbing my eyes because they are itchy, but it doesn't help; they still feel itchy.

4: Based on the information you provided, your diagnosis may be allergic conjunctivitis. I recommend visiting a corneal specialist. You need to use eye drops for treatment, maintain good eye hygiene, and avoid rubbing your eyes. If there's no improvement within a week, you should visit the ophthalmology clinic for a follow-up.

Dialogue 8:

1: I woke up this morning with itchy eyes.

2: 1. Have you noticed an increase in eye discharge? 2. Do you feel any better now? 3. Have you come into contact with anything?

3: 1. There's a bit more discharge. 2. I don't feel any significant change now. 3. No.

4: Based on the information you provided, your diagnosis may be allergic conjunctivitis. I recommend visiting a corneal specialist. You need to use eye drops for treatment and maintain good eye hygiene.

Dialogue 9:

1: Recently, my eyes have been a bit itchy at times.

2: 1. How long have your eyes been itchy? 2. Has your vision decreased? 3. Has there been any improvement?

3: 1. It's been a few months. 2. No. 3. I went to the hospital and got eye drops. It's much better now, but not completely healed yet.

4: Based on the information you provided, your diagnosis may be conjunctivitis. I recommend visiting a corneal specialist. You can continue using the eye drops and avoid rubbing your eyes.

Dialogue 10:

1: Sometimes I suddenly feel a bit of itchiness in my eyes.

2: 1. When do you feel the itch? 2. Have you used any eye drops?

3: 1. Sometimes it itches more when I've been using my eyes a lot. 2. I've used sodium hyaluronate, and it helps a bit afterward.

4: Based on the information you provided, your diagnosis may be dry eye syndrome. I recommend visiting a corneal specialist. Reduce eye usage, take breaks, and continue using sodium hyaluronate.

## **Red eyes (10)**

Dialogue 1:

1: My child had conjunctivitis a month ago and came for a visit. After applying the medication for two or three days, he felt his eyes were no longer red or itchy, so he stopped using it. Recently his eyes became a bit red again. Since it's still not completely healed, we came back to check again.

2: 1. Is there a lot of eye discharge? 2. Does he have rhinitis? Do you keep any pets at home?

3: 1. Not much, very little eye discharge. 2. He's always had rhinitis. We don't have any pets at home.

4: Based on the information you've provided, the diagnosis might be allergic



conjunctivitis. I recommend seeing a cornea specialist. You should clean the house frequently, as common allergens include pet hair and dust mites. Your child's conjunctivitis is quite severe, so I'm adding cyclosporine, to be used three times a day. It may cause a stinging sensation when applied. Continue using the medication previously prescribed for at least 2-3 weeks. Otherwise, the condition may recur and become resistant to treatment.

Dialogue 2:

1: My eyes are dry and itchy, and I have a lot of red veins. My right eye gets especially itchy at night.

2: 1. Do you often stay up late? 2. Do you have any symptoms in the morning when you wake up? 3. How long has this been going on?

3: 1. Yes, I do. 2. In the morning, there's a lot of discharge, and I can't open my eyes. 3. It's been about six months, and the red veins are getting worse.

4: Based on the information you've provided, your diagnosis may be dry eye syndrome and allergic conjunctivitis. I recommend visiting a cornea specialist. Avoid warm compresses while your eyes are itchy. Start using anti-inflammatory and dry eye eye drops, but don't use steroid eye drops for more than two weeks. Blink more often, reduce eye strain, get enough rest, and avoid staying up late.

Dialogue 3:

1: My eye became bloodshot a week ago, and now my eyes feel a bit tired.

2: 1. Do you have a lot of eye discharge? 2. Are your eyes itchy?

3: 1. Not sure. 2. It's okay, not too bad.

4: Based on the information you've provided, your diagnosis may be dry eye syndrome and conjunctivitis. I recommend visiting a cornea specialist. Use eye drops and reduce eye strain. Make sure to get enough rest and avoid staying up late.

Dialogue 4:

1: I feel like my child's vision seems to be declining. Recently, he's been tearing up and

rubbing his eyes a lot. His eyes are a bit red.

2: 1. Any other systemic conditions? Hypertension, diabetes? 2. Has he been tearing up in the past few days?

3: 1. No, but he does have rhinitis. Every time the rhinitis flares up, his eyes tear up. 2. Yes, the rhinitis has been flaring up in the past few days.

4: Based on the information you provided, the diagnosis might be allergic conjunctivitis and refractive error. I suggest visiting a cornea specialist. Allergic conjunctivitis can cause eye irritation symptoms, so I recommend using eye drops to treat the allergic conjunctivitis first. Once the conjunctivitis improves, then proceed with an eye exam for refractive error. Avoid allergens in daily life, reduce eye strain, and also treat the allergic rhinitis.

Dialogue 5:

1: Both of my eyes have been red for more than half a month.

2: 1. Are your eyes itchy? Do you have a lot of eye discharge? 2. Have you had a cold recently?

3: 1. Yes, they're itchy, and there's a lot of discharge. 2. I had a cold once.

4: Based on the information you provided, the diagnosis might be conjunctivitis, possibly secondary to a viral infection. I suggest visiting a cornea specialist. Treatment with eye drops is necessary. Be sure to wash your hands frequently to prevent spreading the infection.

Dialogue 6:

1: My eyes are red. It gets uncomfortable when dust gets in every day. I'm also sensitive to light.

2: 1. Do you have high blood pressure or diabetes? 2. Do you have any issues like arthritis?

3: 1. No. 2. I don't think I have arthritis.

4: Based on the information you provided, your diagnosis might be possible glaucoma, which needs to be ruled out. I recommend visiting a glaucoma specialist. You need to

check your intraocular pressure and have an ultrasound examination for further investigation.

Dialogue 7:

1: My eyes often feel dry and a bit red and swollen.

2: 1. Has your vision deteriorated?

3: 1. My vision is fine.

4: Based on the information you provided, your diagnosis might be dry eye syndrome. I recommend visiting a cornea specialist. You can use eye drops for relief, reduce screen time on phones and computers, and minimize eye strain.

Dialogue 8:

1: My eyelid is red and swollen.

2: 1. Do your eyes itch, and do you often rub them?

3: 1. My eyes itch a bit, and sometimes I rub them.

4: Based on the information you provided, your diagnosis might be allergic conjunctivitis. I recommend visiting a cornea specialist. This condition can be seasonal and may recur. During flare-ups, avoid rubbing your eyes, use eye drops for treatment, reduce eye strain, and maintain good eye hygiene.

Dialogue 9:

1: My eye suddenly became swollen.

2: 1. How many days has it been swollen? 2. Did you have any tests done during your first visit to the doctor? 3. Did you use steroids the first time it swelled? Was it administered through an IV or an injection? 4. Did it get better after using the medication? Is anywhere else swollen?

3: 1. This is the second time it's swollen, and it's been almost 20 days since the first time. The first swelling was on May 18. 2. I had an MRI, and they mentioned IgG4, but it wasn't confirmed. 3. I was given an IV, and received a dose of a few milligrams. 4. It gradually went down. No other areas are swollen.

4: Based on the information you provided, your diagnosis might be IgG4-related ophthalmic disease. I recommend visiting a specialist in orbital and ocular tumor diseases. To further confirm the diagnosis, additional tests such as a biopsy and MRI may be necessary.

Dialogue 10:

1: My eyes are red.

2: 1. How long have your eyes been red? 2. Have you used any medication? 3. Besides the redness, is there any other discomfort? 4. Is there a lot of discharge? 5. Is your vision clear? Has there been any change? 6. Do you have any systemic diseases?

3: 1. One week. 2. I've used eye drops, but I can't say exactly which ones. 3. No, nothing else. 4. Yes, I have a lot of eye discharge. 5. Sometimes I can't see things clearly, but no significant changes compared to before. 6. I have high blood pressure and moyamoya disease.

4: Based on the information you provided, your diagnosis might be conjunctivitis. I recommend visiting a cornea specialist. Continue using eye drops for treatment.

### **Eye swelling (7)**

Dialogue 1:

1: My left eye is swollen and painful. It hurt a little the day before yesterday, and yesterday it became swollen. The inner double eyelid has swollen into an outer double.

2: 1. Does it hurt when you press on it? 2. Have you been staying up late a lot recently? 3. Any other symptoms?

3: 1. Yes, it hurts. 2. Yes, I've been staying up late a lot. 3. Nothing else is wrong.

4: Based on the information you've provided, your diagnosis may be a stye (hordeolum). I recommend visiting a cornea specialist. Treatment with antibiotic eye drops is needed. Follow a light diet, and avoid tea and coffee. Apply warm compresses before bed. Reduce eye strain, and avoid staying up late.

Dialogue 2:

1: In 2020, my eyes became swollen, so I came here for a checkup and had some tests done. I was prescribed some steroids. At first, the swelling went down quickly, but by the time I took the fifth pill, it stopped being effective. Now, I want to come back for another checkup.

2: 1. Have you been taking steroids recently? 2. Are both sides of your cheeks swollen? 3. Has it worsened over the past two years?

3: 1. I haven't taken any recently. I stopped after finishing the prescription. 2. Yes, my cheeks are swollen. 3. It hasn't worsened much.

4: Based on the information you provided, your diagnosis might be IgG4-related ophthalmic disease. I recommend visiting a specialist in orbital and ocular tumor diseases. This is a systemic disease that can also affect the parotid glands in addition to the lacrimal glands. Steroids are the primary treatment, and immunosuppressants can be added if necessary. If there hasn't been any significant swelling recently, it may be considered inactive, and no medication is required for now—just observation. If it suddenly swells up, you should come in for treatment. Surgery for removal can also be considered.

Dialogue 3:

1: A week ago, my right eye suddenly became red and swollen, and something formed that started oozing pus. The hospital gave me some cephalosporin.

2: 1. Does it still hurt when you press on it now?

3: 1. It doesn't hurt as much as before.

4: Based on the information you provided, your diagnosis might be meibomian gland inflammation. I recommend visiting a specialist in orbital and ocular tumor diseases. The inflammation might be extensive, so you should continue using the cephalosporin until the inflammation subsides. If it doesn't heal completely, surgery may be required.

Dialogue 4:

1: The area under my right eye is swollen. It has swollen before, and it was very large at that time.

2: 1. How long has it been swollen? 2. Did it swell up suddenly or gradually? 3. Have you seen a doctor for it? Did the vision loss happen suddenly? 4. Was your eye swollen when you lost vision? Was it just the right eye or both eyes? 5. Have you been given steroids intravenously, or have you only taken oral steroids? Did your condition improve after using them? Are you currently taking steroids, and how many tablets per day? 6. Do you have hyperthyroidism? 7. Are you seeing double vision now?

3: 1. It's been a year, starting in May last year. 2. It swelled up suddenly, and I couldn't see out of my eye. 3. I've seen a doctor. They said it might be an inflammatory pseudotumor, but it wasn't confirmed. My vision gradually disappeared. 4. No, the swelling occurred two or three days later, and only on the right side. 5. I took oral steroids. It got a bit better at the time. I'm still taking them now, two tablets a day. 6. No. 7. I used to have double vision, but not anymore after taking steroids.

4: Based on the information you provided, your diagnosis might be an inflammatory pseudotumor. I recommend visiting a specialist in orbital and ocular tumor diseases. Further diagnostic tests, including blood work for thyroid function and other markers, are necessary to determine the cause and develop a treatment plan.

#### Dialogue 5:

1: My eyes suddenly became swollen.

2: 1. How many days have they been swollen? 2. Did you have any tests done during your first visit to the doctor? 3. Did you use steroids the first time they swelled? Were they administered through an IV or an injection? 4. Did they get better after using the medication? Is anywhere else swollen?

3: 1. This is the second time they're swollen, and it's been almost 20 days since the first time. The first swelling was on May 18. 2. I had an MRI, and they mentioned IgG4, but it wasn't confirmed. 3. I was given an IV. 4. It gradually went down. No other areas are swollen.

4: Based on the information you provided, your diagnosis might be IgG4-related ophthalmic disease. I recommend visiting a specialist in orbital and ocular tumor diseases. To further confirm the diagnosis, additional tests such as a biopsy and MRI

may be necessary.

Dialogue 6:

1: There's a small lump on my eyelid, which is swollen. It's been more than a month, and it hasn't gone down.

2: 1. Do you have a lot of eye discharge? Has it improved? 2. Is it painful?

3: 1. I had a lot of discharge some time ago, but it's better now. 2. It doesn't hurt.

4: Based on the information you provided, your diagnosis might be a meibomian gland cyst. I recommend visiting a specialist in orbital and ocular tumor diseases or cornea diseases. You can start with anti-inflammatory eye drops, and have a follow-up in two weeks. If it doesn't resolve over time, surgery may be considered.

Dialogue 7:

1: My eyes have been swollen for two days.

2: 1. Have you come into contact with anything recently? 2. Has it worsened or improved?

3: 1. No, it just suddenly swelled up. 2. I feel like it's a bit more swollen today than yesterday.

4: Based on the information you provided, your diagnosis may be blepharitis. I recommend visiting a corneal specialist. Use an eye ointment on the skin, and if there is no improvement within a week, please return for a follow-up at the ophthalmology clinic.

## **Eye pain (10)**

Dialogue 1:

1: These past few days, my child has been saying his right eye hurts. The eye is very red.

2: 1. Is his right eye itchy? Do you have pets at home?

3: 1. It's not itchy. We don't have any pets at home.

4: Based on the information you've provided, the diagnosis might be allergic

conjunctivitis. I recommend visiting a cornea specialist. The eye pain is likely caused by the allergy. Make sure to clean the house thoroughly. I've prescribed eye drops for your child.

Dialogue 2:

1: My left eye became very red and painful yesterday afternoon.

2: 1. Have you experienced this before? 2. Do you have any systemic diseases, such as immune-related issues? 3. Does it hurt when you press on your eye? 4. Have you been staying up late or under a lot of stress lately? 5. Has there been a noticeable change in your vision? 6. Are your eyes itchy?

3: 1. No. 2. No. 3. It hurt yesterday, but not today. 4. Not really. 5. No significant change in vision. 6. They were a bit itchy a few days ago, but not much now.

4: Based on the information you've provided, your diagnosis may be scleritis. I recommend visiting a retina specialist. Anti-inflammatory eye drops are needed. After using them for 7-10 days, a follow-up is required. Further testing of eye pressure is also necessary. Make sure to rest well.

Dialogue 3:

1: I have diabetes, and now my eyes feel a bit scratchy.

2: 1. Do both eyes feel scratchy?

3: 1. Yes, both eyes feel scratchy.

4: Based on the information you've provided, your diagnosis may be dry eye syndrome. I recommend visiting a cornea specialist. You need to reduce eye strain and limit screen time. You can use eye drops. Also, make sure to follow up with internal medicine for your diabetes.

Dialogue 4:

1: I have glaucoma in my eyes. Recently, they sometimes feel swollen, and it gets a bit better after tearing. I'd like to get some medication.

2: 1. It may not necessarily be an issue with intraocular pressure. Do your eyes feel dry?



2. I suggest getting your intraocular pressure checked.

3: 1. My eyes feel a little dry. 2. I won't check.

4: Based on the information you provided, your diagnosis might be dry eye syndrome. I suggest visiting a cornea specialist. It's also recommended to regularly monitor your intraocular pressure for follow-up and medication adjustment. Dry eye syndrome can be treated with eye drops.

Dialogue 5:

1: I previously had my eye pressure measured, and it was quite high at around 30. But the tests didn't show anything unusual.

2: 1. Have you had a corneal endothelium exam? 2. Do you feel any soreness or pressure?

3. Has your eye pressure been high before?

3: 1. Yes, they said my cornea is a bit thick. 2. Yes, a couple of days ago when I pressed on my eye, I felt pressure and had a headache. 3. Yes, it's always been high since I was a child.

4: Based on the information you provided, the diagnosis might be suspected glaucoma. I suggest visiting a glaucoma specialist. Additional glaucoma tests are necessary, but other causes cannot be ruled out based on your symptoms.

Dialogue 6:

1: My right eye corner hurts, and my eye keeps tearing up. I've already come for several check-ups.

2: 1. Have you had surgery?

3: 1. No, I didn't have surgery. Last time, they said it was inflammation and prescribed medication. When I came back, they said the inflammation was gone. So they didn't do surgery.

4: Based on the information you provided, the diagnosis might be nasolacrimal duct obstruction. I suggest visiting a specialist in orbital diseases and ocular tumors. A nasal endoscopic dacryocystorhinostomy or lacrimal duct stenting treatment is recommended. Since you've had inflammation before, the success rate of lacrimal duct stenting is

about 60%. If you undergo dacryocystorhinostomy, it requires general anesthesia and hospitalization, with a success rate of around 80%.

Dialogue 7:

1: My eyes hurt, and my vision is very blurry right now.

2: 1. How long has this been happening? 2. Do you have high blood pressure or diabetes? 3. Have you had a cold recently? Are your eyes itchy? 4. Have you had similar symptoms before? Have you ever had inflammation in your eyes? 5. Can you usually see clearly? Have you been diagnosed with glaucoma before?

3: 1. It's been hurting for more than ten days. I haven't been using my phone lately, and I've been going to bed earlier. 2. No, I don't have either. 3. No, I haven't had a cold, and my eyes aren't itchy. 4. No, never had anything like that. 5. I can see fine. They didn't say I have glaucoma, just a bit of cataract.

4: Based on the information you provided, the diagnosis might be suspected glaucoma. I suggest visiting a glaucoma specialist for a thorough glaucoma examination.

Dialogue 8:

1: I used to have glaucoma. A couple of days ago, my right eye started to hurt as if an eyelash had fallen into it. But after checking, it was fine. Yesterday, it hurt again and became swollen.

2: 1. The corneal epithelium of this eye is damaged. Have you ever had uveitis before? 2. Has your eye been injured? Has anything floated into it? 3. Do you have diabetes or high blood pressure? 4. Is your intraocular pressure usually normal with medication? 5. Is your eye in severe pain? Are you vomiting?

3: 1. No. 2. No. 3. No. 4. It's about 24 now. 5. It was very painful a few days ago. No vomiting.

4: Based on the information you provided, your diagnosis might be glaucoma. I recommend seeing a glaucoma specialist. Your glaucoma is quite severe. And your eye might be decompensating. You need an examination to assess the situation. If it's too bad, you might not be able to save the eye.

Dialogue 9:

1: Over a month ago, I suddenly experienced a pain in my eye like an explosion. It was the first time and also the most severe. After that, there were a few more instances of sudden sharp pain. My eye pressure was measured as normal.

2: 1. Do you have any other conditions?

3: 1. In recent years, I've only had insomnia, and my temples hurt. At night, I can't sleep on my side, only on my back. At first, I thought it was a nerve issue caused by insomnia, but an MRI didn't show any problems.

4: Based on the information you provided, your diagnosis might be dry eye syndrome. I recommend visiting a cornea specialist. It may be related to eye strain. Using sodium hyaluronate eye drops may help relieve the symptoms.

Dialogue 10:

1: My right eye feels a bit swollen and painful.

2: 1. Is it constantly swollen, or does it come and go? Is it only in the right eye? 2. Have you used any eye drops? Did the swelling and pain start before or after using the eye drops? 3. How is your nearsightedness?

3: 1. I had an eye checkup a month ago in another city. They measured my eye pressure, and it wasn't very low. The swelling and pain are only in the right eye. 2. I had conjunctivitis before and used steroid eye drops for a month. The swelling and pain started before using the eye drops. Later, I switched to a non-steroid eye drop. 3. I have about 500-600 degrees of nearsightedness and around 300 degrees of astigmatism.

4: Based on the information you provided, your diagnosis might be glaucoma. I recommend visiting a glaucoma specialist. You will need to undergo tests such as applanation tonometry, OCT, and corneal thickness measurements for further evaluation.

## **Eye discharge (8)**

Dialogue 1:

1: My child's left eye is a bit sore, there is a lot of eye discharge. A couple of days ago the eye was a bit red.

2: 1. Does your child sneeze easily? Has there been recent contact with animals?

3: 1. Sneezing is not too bad. We have a cat, and we've had it for about two months.

4: Based on the information you've provided, your diagnosis may be allergic conjunctivitis. I recommend visiting a cornea specialist. Allergy testing is needed, as the allergens could be dust mites, animals, etc. Eye drops are needed, and it's important to avoid allergens. If the symptoms don't improve, come back for a follow-up in two weeks.

Dialogue 2:

1: I had my tear duct flushed yesterday, and it seems like there's more discharge from my left eye today.

2: 1. Does it hurt?

3: 1. No, it doesn't hurt.

4: I recommend visiting an orbital disease and ocular tumor specialist. There don't appear to be any visible abnormalities. You can try using some anti-inflammatory eye drops to see if the symptoms improve.

Dialogue 3:

1: My child's eye suddenly became swollen yesterday. There's a feeling of a jelly-like substance in the eye. The lower eyelid looks dark. And now there are some red veins.

2: 1. Did he come into contact with anything yesterday? 2. Are the eyes itchy? 3. Does he have allergic rhinitis?

3: 1. We don't know what he might have come into contact with. 2. Yes, it's itchy. This morning, he wanted to rub his eyes. 3. Yes, he does have rhinitis.

4: Based on the information you provided, the diagnosis might be allergic conjunctivitis. I recommend visiting a cornea specialist. Eye drops will be needed for treatment. In the meantime, avoid seafood, don't rub the eyes, and be careful around dust, pollen, and plush toys.

Dialogue 4:

1: This morning, my child's right eye was extremely red and had some discharge.

2: 1. Has this happened repeatedly?

3: 1. Yes, it has happened before. But today the eye is extremely red, much redder than ever before.

4: Based on the information you provided, your diagnosis might be vernal allergic conjunctivitis. I recommend visiting a cornea specialist. Eye drops are suggested for treatment.

Dialogue 5:

1: Since yesterday, my child has suddenly had a lot of eye discharge, and the eyes stick together. The eyes are very red inside.

2: 1. Which eye? 2. Any known allergies?

3: 1. Both eyes. 2. Allergic to certain foods.

4: Based on the information you provided, the diagnosis might be conjunctivitis. I recommend visiting a corneal specialist. Eye drops are needed for treatment, and it's important to maintain eye hygiene. If there is no improvement in a week, a follow-up visit to the eye clinic is advised.

Dialogue 6:

1: Recently, my eyes have been tearing up more.

2: 1. Do your eyes feel itchy? 2. Has the amount of discharge in your eyes increased in the morning? 3. Do your eyes feel dry usually?

3: 1. No, they don't itch. 2. No, they haven't. 3. Yes, they do.

4: Based on the information you provided, your diagnosis may be dry eye syndrome. I recommend visiting a corneal specialist. You can use hyaluronic acid eye drops or polyethylene glycol eye drops to relieve the symptoms.

Dialogue 7:

1: Recently, I've had more eye discharge.

2: 1. Have your eyes been itchy or red? 2. Do you rub your eyes a lot? 3. Have you used any eye drops?

3: 1. They were itchy and red before, but they've been okay these past few days. 2. I rub them when they itch. 3. I got some eye drops before, and after using them, my eyes don't itch as much.

4: Based on the information you provided, your diagnosis may be conjunctivitis. I recommend visiting a corneal specialist. Maintain eye hygiene and avoid rubbing your eyes. If redness and itching become severe, please seek medical attention promptly.

Dialogue 8:

1: My eyes keep tearing up.

2: 1. How long has this been happening? 2. Has it been continuous, or has there been any improvement? 3. Do your eyes feel itchy?

3: 1. About two years. 2. They've been tearing up heavily for the past two years. 3. No, they're not itchy.

4: Based on the information you provided, your diagnosis may be a tear duct obstruction. I recommend visiting an orbital disease and eye tumor specialist. Surgery might be necessary to unblock the tear duct.

### **Eye masses (5)**

Dialogue 1:

1: I have a small growth on my eye.

2: 1. When did it appear, and has it grown larger?

3: 1. It appeared when my eyes were quite itchy before, and it's been there ever since. It hasn't grown bigger.

4: Based on the information you've provided, your diagnosis might be a conjunctival mass. I recommend visiting an orbital and ocular tumor specialist.

Dialogue 2:

1: There is a small white spot under my eyelid, and it's been there for a month.

2: 1. Can you feel it by touching it? 2. Have you been staying up late often?

3: 1. Yes, I can feel it. 2. I've been staying up late a lot recently.

4: Based on the information you've provided, your diagnosis may be meibomian gland stones. I recommend visiting a cornea specialist. I suggest doing meibomian gland massages. At home, apply warm compresses, massage the area, and use sodium hyaluronate eye drops. Try to reduce eye strain, get enough rest, and avoid staying up late.

Dialogue 3:

1: I developed something on my upper and lower eyelids of my left eye a couple of days ago.

2: 1. Does it hurt when you press on it? 2. Do you usually stay up late?

3: 1. Yes, it hurts. 2. Yes, I stay up late.

4: Based on the information you've provided, your diagnosis may be a sty (hordeolum). I recommend visiting a cornea, orbital disease, and ocular tumor specialist. Reduce staying up late. Apply warm compresses to the eye 3-4 times a day. And follow a light diet. Use eye drops and ointment for treatment.

Dialogue 4:

1: There is something growing on my eyelid.

2: 1. How long has it been there? 2. Has it gotten bigger recently?

3: 1. It started growing when my eye was itchy. 2. It hasn't really changed in size. My eye used to be itchy, red, and swollen, but after that went away, this growth appeared.

4: Based on the information you've provided, your diagnosis may be an eyelid mass. I recommend visiting an orbital disease and ocular tumor specialist. Surgical removal is likely needed, and a biopsy should be done.

Dialogue 5:

1: I keep developing small hard nodules in both eyes.

2: 1. Do you often rub your eyes? 2. Have you had surgery before?

3: 1. Sometimes I do rub them. 2. I had a surgery two weeks ago, but they grew back afterward.

4: Based on the information you provided, your diagnosis might be a meibomian gland cyst. I recommend visiting a specialist in corneal or orbital and ocular tumor diseases. During the acute phase, you can use antibiotic eye drops or ointment, apply warm compresses appropriately, avoid smoking and drinking, and maintain a light diet. Try to avoid eye strain and don't rub your eyes. If it persists for a long time, surgery may be considered.

### **Blurry vision (13)**

Dialogue 1:

1: I can't see clearly; I have a bit of cataracts.

2: 1. What are your main symptoms? 2. Is it hard for you to see far away or close up? 3. Do you have diabetes?

3: 1. I can't see clearly either with or without glasses. 2. I can't see well up either close or far away. 3. Yes, I have diabetic nephropathy. My blood sugar is usually around 8, 9, or 10, and fasting level is around 9.

4: Based on the information you've provided, your diagnosis may be refractive error and cataracts. I recommend visiting a specialist in refractive issues and cataracts. You should also consider getting a prescription for glasses. As for diabetes, you need to see an endocrinologist for treatment.

Dialogue 2:

1: I've been seeing another hospital for diabetes-related eye issues for a few years, and now my vision in my right eye is very poor.

2: 1. How long have you had diabetes? Is it well-controlled? How are you treating it now? 2. Have you had any recent tests? 3. Does this eye have any other problems? 4. How long have you had poor vision in your right eye? 5. Do you have any immune system-related diseases?



3: 1. It's been 4 years. My blood sugar is fairly well controlled—around 12-15 after meals and 6 when fasting. I regularly take insulin injections. 2. No, I haven't had any recent tests. 3. This eye was injured 10 months ago when a band snapped and hit it. 4. For about a year. 5. No, I don't have any immune-related diseases.

4: Based on the information you've provided, your diagnosis may be diabetic retinopathy. I recommend visiting a retina specialist. Cataracts and trauma-related complications cannot be ruled out either. Further tests are needed for a full evaluation.

Dialogue 3:

1: Our child is almost 3 years old and just started preschool. The check-up indicated he has an abnormal refraction.

2: 1. Is the abnormal refraction related to vision problems or something else? What were the results?

3: 1. The test showed 1.2 and 1.5.

4: Based on the information you've provided, no significant abnormalities have been found so far. I recommend visiting a specialist in refractive issues. A manual vision test may be needed, and you could consider getting a cycloplegic refraction test.

Dialogue 4:

1: My child's vision has recently deteriorated significantly. Over a week ago, we checked his vision, and he could only see 0.5. But the test showed only 50 degrees of myopia. His left eye used to be 1.0, and he wears orthokeratology (OK) lenses for the right eye, but now the problem is with the left eye.

2: 1. Was the pupil dilated during the previous exam? 2. Can he see clearly with his right eye covered and using just his left eye?

3: 1. Yes, the pupil was dilated. 2. He can only see a little bit.

4: Based on the information you've provided, the diagnosis may be a refractive error. I recommend visiting a specialist in refractive issues. A new vision test is needed, and I suggest also checking the axial length of the eye. It may be necessary for both eyes to wear OK lenses.

Dialogue 5:

1: I'm 70 years old, and my vision started declining last year.

2: 1. Do you have high blood pressure or diabetes? 2. I can see that your cataracts are quite severe. You also have a pterygium in your left eye, which is partially covering the pupil.

3: 1. I don't think I have either.

4: Based on the information you've provided, your diagnosis may be cataracts in both eyes and a pterygium in your left eye. I recommend visiting specialists in cataract and corneal care. Surgery is advised, and it will need to be done in stages—first to remove the pterygium, and then to address the cataracts.

Dialogue 6:

1: My vision in my right eye has deteriorated significantly over the past two years. I can't see things up close very clearly without glasses now.

2: 1. Can you see clearly with glasses on in your right eye? How about your left eye? 2. How many degrees of myopia do you have in your right eye? 3. Do you have high blood pressure or diabetes? 4. Do you experience any distortion or warping when looking at things? 5. I can see you have some cataracts, and the posterior capsule is a bit cloudy.

3: 1. My vision in my right eye has worsened a lot, even with glasses. But my left eye is still okay. 2. My right eye has 600 degrees of myopia and 300 degrees of astigmatism.

3. No, I don't have either. 4. No, I don't experience distortion.

4: Based on the information you've provided, your diagnosis may be cataracts and refractive error. I recommend visiting a specialist in cataract and refractive care. I suggest getting a new vision test for both distance and near vision.

Dialogue 7:

1: About two-thirds of my vision in both eyes suddenly became pixelated this afternoon.

2: 1. So, you can't see clearly? Did it turn black? 2. Do you normally have good blood circulation? 3. Can you still not see clearly now? Are your eyes dry? 4. How many

degrees of myopia do you have?

3: 1. Yes, I couldn't see clearly, but it didn't turn black. 2. I have neck issues that sometimes compress the nerves. I feel like my eye pressure is high, and my eyes feel tight. 3. It's better now, but my eyes are dry. 4. 400 degrees of myopia.

4: Based on the information you've provided, your diagnosis may be dry eye syndrome. I recommend visiting a cornea specialist and having a retinal examination. I suggest using eye drops. The neck issue should be followed up with internal medicine, as impaired blood circulation could potentially affect your vision.

Dialogue 8:

1: My elderly family member can't see.

2: 1. How long has this been going on? Can she see anything at all? Is her vision completely gone? 2. Does she have high blood pressure, diabetes, or any other health issues?

3: 1. It started in the second half of last year. She can't see some things and her vision is blurry. 2. She has high blood pressure, but no other health issues.

4: Based on the information you've provided, the diagnosis may be age-related cataracts. I recommend visiting a cataract specialist. However, other eye conditions, such as retinal diseases, should also be ruled out.

Dialogue 9:

1: My vision is blurry. Could it be cataracts?

2: 1. Do you have high blood pressure or diabetes?

3: 1. No, I don't.

4: Based on the information you've provided, your diagnosis may be age-related cataracts. I recommend visiting a cataract specialist. According to the examination, there are no issues with your retina, and the cataracts don't seem too severe.

Dialogue 10:

1: A doctor of another hospital said that the fundus of my elderly family member's eyes

is not in good condition. Both of his eyes have had lenses implanted.

2: 1. Are his eyes uncomfortable now? When did he have cataract surgery? 2. Does he have high myopia?

3: 1. He can't see clearly with the left eye now. Both eyes had surgery about five or six years ago. 2. Yes, he was told it's a refractive error, and the back of his eyes isn't in good condition.

4: Based on the information you provided, it is necessary to rule out retinal and macular degeneration. I suggest visiting a retina specialist for further examination. If the macula is in fair condition, laser treatment can be considered.

Dialogue 11:

1: My elderly family member sometimes feels like her eye pressure is high. Yesterday, she was checked for glaucoma which seems to be ruled out. Sometimes her vision is blurry.

2: 1. Her cataracts are quite severe now. She need to address the cataracts first.

3: 2. So, she can have the cataract surgery now, right?

4: Based on the information you provided, the diagnosis might be cataracts. I suggest visiting a cataract specialist. Surgery will be necessary for treatment.

Dialogue 12:

1: I'm 83 years old, and my vision is blurry. I can't see clearly. I had sinusitis before and had surgery on my frontal sinus.

2: 1. How long has your vision been blurry? 2. Do you have any other health issues?

3: 1. I haven't been able to see clearly for a long time. 2. No, I don't have other issues.

4: Based on the information you provided, the diagnosis might be cataracts. I suggest visiting a cataract specialist. You will need an eye exam and vision test, and surgery may be necessary depending on the results.

Dialogue 13:

1: I can't see clearly with my right eye.

2: 1. How long has it been like this? 2. How is your myopia?

3: 1. It's been several years. It wasn't this bad before, but now I can barely see. 2. I have severe myopia.

4: Based on the information you provided, the diagnosis might be macular degeneration. I suggest visiting a retina specialist. An OCT scan of the retina is recommended for further examination.

### **Double vision (6)**

Dialogue 1:

1: My left eye can't move, and the eyelid is drooping. I see double vision.

2: 1. Does your eye hurt?

3: 1. No, it doesn't hurt now.

4: Based on the information you provided, the diagnosis might be oculomotor nerve palsy. I suggest visiting a neuro-ophthalmology specialist. You should also see a neurologist for further evaluation.

Dialogue 2:

1: I've had poor vision since I was a child. Ever since I can remember, I've seen a bit of double vision. When I was around 18 or 19, I had corrective surgery. Now, I feel like my eyes are misaligned again.

2: 1. What kind of surgery did you have? 2. Were you born prematurely?

3: 1. Strabismus correction surgery. 2. No, I wasn't.

4: Based on the information you provided, your diagnosis might be strabismus. I recommend visiting a specialist in strabismus. You will need imaging tests such as ultrasound, CT, or MRI to rule out orbital tumors and other intraocular conditions.

Dialogue 3:

1: I feel like my strabismus has gotten worse recently.

2: 1. Are you seeing double? How long have you had double vision?

3: 1. Yes, I'm seeing double. I'm not sure if it was there before, but recently it's become

much worse. Now I can see two people, but I can control it. I don't know if I've always been controlling this.

4: Based on the information you provided, your diagnosis might be strabismus. I recommend visiting a specialist in strabismus. If the double vision has been present for more than six months, you can consider prism glasses or surgical treatment. Wearing prism glasses can eliminate the double vision, but there may be a dependency on them.

Dialogue 4:

1: Sometimes I see two images when looking at things.

2: 1. How long has this been happening? 2. Do you have any redness or pain in your eyes? 3. Have you had eye surgery before? 4. Is your vision clear?

3: 1. It's been a while. 2. There's some soreness. 3. No, I haven't. 4. No, it's not clear.

4: Based on the information you provided, your diagnosis might be dry eye syndrome. I recommend visiting a cornea specialist. You should also undergo tests to rule out cataracts.

Dialogue 5:

1: I see double vision when I wake up in the morning.

2: 1. Are both of your eyes bulging, and how long has this been happening? 2. Do you have hyperthyroidism? 3. Have your eyes been red or swollen recently?

3: 1. About half a year. 2. I was recently diagnosed with it. 3. They were red and swollen six months ago.

4: Based on the information you provided, your diagnosis may be thyroid eye disease. I recommend visiting an orbital disease and eye tumor specialist. Steroid therapy might be necessary.

Dialogue 6:

1: I had strabismus surgery when I was a child. Recently I've been seeing double. Is it a recurrence?

2: 1. How long have you had double vision? 2. Have you tried wearing prism glasses

for correction?

3: 1. It's been a few years. 2. I wore them before, but recently it feels like it's getting worse.

4: Based on the information you provided, your diagnosis may be strabismus. I recommend visiting a strabismus specialist. You may need another corrective surgery.

### **Eye injuries or foreign bodies (6)**

Dialogue 1:

1: I got hit in the eye while playing ball, and now I occasionally feel like there's a black object floating across my vision.

2: 1. When did the injury from playing ball happen? 2. Do you feel any foreign body sensation?

3: 1. A month ago. 2. No foreign body sensation, but it feels like there's a hair or blood streak floating in my eye.

4: Based on the information you provided, the diagnosis might be vitreous floaters, possibly secondary to the eye injury. I suggest visiting a retina specialist. It's recommended to do an ultrasound and check your intraocular pressure to rule out retinal damage caused by the injury. If no specific issues are found, the floaters can be left alone as they may improve over time.

Dialogue 2:

1: Something hit my eye a week ago, but I'm not sure what it was. The local hospital said there was some bleeding and that it should absorb naturally. But I'm still worried. So I came for a check-up.

2: 1. Do you have any idea what hit you? Was it something like iron or wood? 2. Has it gotten a little better over the past few days? 3. Did you lose consciousness when it happened?

3: 1. It was an iron rod. 2. It's a bit better, but it seems to vary. For example, in the morning, it feels better. But it worsens in the evening. 3. No, I didn't lose consciousness.

4: Based on the information you provided, the diagnosis might be vitreous hemorrhage.

I suggest visiting a retina specialist. It's recommended to do an ultrasound to further examine the retina. If the ultrasound shows no issues, you can continue waiting for the blood to absorb. However, if retinal problems are detected, further treatment may be necessary.

Dialogue 3:

1: I injured my right eye while playing basketball half a month ago. I got more than ten stitches. The CT showed a slight orbital fracture. The hospital said my eye socket is slightly sunken, which might affect my appearance in the future, and the eyeball might sink in.

2: 1. Were you wearing glasses at the time? Did the glasses break? 2. Did you lose consciousness at the time? 3. Was the eyeball damaged?

3: 1. Yes, I was. The glasses broke. 2. No, I didn't lose consciousness. 3. The eyeball wasn't damaged.

4: Based on the information you provided, your diagnosis might be an orbital fracture. I recommend visiting a specialist in orbital and ocular tumor diseases. Since the fracture is relatively small, treatment might not be necessary. The chances of a sunken appearance are low. Regular follow-up is recommended.

Dialogue 4:

1: A couple of days ago, I bumped my left eye, and now I can't see things completely. It feels like something is blocking my vision.

2: 1. Is it in a specific direction? 2. Do you have high myopia? 3. Do you have high blood pressure or diabetes? 4. Is the blockage still there? 5. Do you ever experience flashes of light in your vision?

3: 1. It's on the left side of my left eye. 2. I don't have high myopia, I'm around 300-400 degrees. 3. I have high blood pressure, around 140 systolic. 4. Yes, it's still there. 5. No flashes of light.

4: Based on the information you provided, your diagnosis might be retinal detachment. I recommend visiting a retina specialist. Further tests such as an ultrasound, fundus



photography, and OCT are recommended for further investigation.

Dialogue 5:

1: I hit my right eye while playing basketball, and it hurts.

2: 1. Has your vision changed? 2. Is there any other discomfort in your eye?

3: 1. My vision seems fine. 2. My eye is a bit red.

4: Based on the information you provided, your diagnosis might be an eye injury. I recommend going to the emergency department. The redness could be caused by mechanical irritation leading to conjunctival congestion. You can use soothing eye drops for treatment, and avoid rubbing your eye.

Dialogue 6:

1: My eye was punched several times by a colleague today, and now it's painful and swollen.

2: 1. Do you feel any change in your vision? 2. Is your nearsightedness severe?

3: 1. I don't feel much change in my vision. 2. I have amblyopia, and my vision has been poor since childhood, around 0.5.

4: Based on the information you provided, your diagnosis might be a contusion injury to the eye. I recommend visiting the emergency department. Further tests like an ultrasound or UBM are needed to rule out any lens issues.

### **Proptosis (4)**

Dialogue 1:

1: When I lie down recently, I feel like my right eye is positioned slightly higher than my left eye.

2: 1. I don't think your eye protrusion is very obvious. Everyone's eyes aren't perfectly symmetrical. Do you feel like your eyes are bulging like a celebrity's?

3: 1. It's actually been like this for a long time, but I've gotten used to it.

4: Based on the information you provided, the diagnosis might be dry eye syndrome. I suggest visiting a cornea specialist. You can use sodium hyaluronate eye drops when

your eyes feel fatigued. Try to reduce screen time, take care of your eyes, and avoid staying up late.

Dialogue 2:

1: My eyes started to swell in April. The doctor said it was meibomian gland dysfunction and conjunctivitis. This morning, I felt that my eyes looked different. One eye appeared much bigger.

2: 1. Do you have hyperthyroidism? 2. Is your kidney function normal? 3. How much time has passed since you first noticed the swelling? 4. Do you feel that your eyelids are heavier in the morning?

3: 1. No. 2. I haven't had any other abnormalities, and I didn't have any issues before. 3. Two months. 4. Yes, it feels heavier in the morning.

4: Based on the information you provided, your diagnosis might be upper eyelid retraction. I recommend visiting a specialist in orbital and ocular tumor diseases. Thyroid-related eye disease or other systemic conditions cannot be ruled out. Thyroid function tests, kidney function tests, and a CT scan are needed for further investigation.

Dialogue 3:

1: Recently, I've been feeling a bit dizzy, and my eyes have been tearing up. I went for a checkup, and last week, a cavernous hemangioma was found in my left eye. I also feel like my left eye is slightly protruding.

2: 1. How long have you noticed that your eye is protruding? 2. Do you have any other health issues like high blood pressure, diabetes, or hyperthyroidism? 3. Do you see double images? 4. Do you notice significant changes in your eye when you lower your head, or not much?

3: 1. The most noticeable change has been for about a month. 2. No. 3. No. 4. I don't notice much change.

4: Based on the information you provided, your diagnosis might be a cavernous hemangioma. I recommend visiting a specialist in orbital and ocular tumor diseases. A CT scan is needed to assess the bony structure. If the tumor is not growing quickly,

observation is an option, but surgery can also be considered, though there is a risk of blindness with surgery.

Dialogue 4:

1: I used to have hyperthyroidism, and now I feel like I can't fully close my eyes when sleeping at night.

2: 1. Have your eyes become more protruded recently?

3: 1. I feel like they are slightly protruding, but there hasn't been any noticeable change recently.

4: Based on the information you provided, your diagnosis might be thyroid eye disease. I recommend visiting a specialist in orbital and ocular tumor diseases. Further tests are needed to assess if it is caused by thyroid-related eye disease leading to eyelid retraction. You can try using soothing eye drops to relieve the dryness for now.
